# Supplementary material for: Quantum Spin-Engineering in On-Surface Molecular Ferrimagnets
Source: Research Square preprint supplement (doi:10.21203/rs.3.rs-5607662/v1), 2025-01-29
Supplement: Supplementary file 1 [file a85382f30a5eaa1ab6d44a93.docx]

Supplementary Information

Quantum Spin-Engineering in On-Surface Molecular Ferrimagnets

Wantong Huang1, Máté Stark1, Paul Greule1, Kwan Ho Au-Yeung1, Daria Sostina1,2, José Reina Gálvez3,4, Christoph Sürgers1, Wolfgang Wernsdorfer1,2, Christoph Wolf3,4, Philip Willke1,*

1. Physikalisches Institut, Karlsruhe Institute of Technology (KIT), Karlsruhe, Germany
2. Institute for Quantum Materials and Technologies, Karlsruhe, Germany
3. Center for Quantum Nanoscience, Institute for Basic Science (IBS), Seoul, Republic of Korea.
4. Ewha Womans University, Seoul, Republic of Korea.

* corresponding author: [philip.willke@kit.edu](mailto:philip.willke@kit.edu),

**Table of Contents**

[1. Building FePc-Fe(C6H6) complexes 2](#_Toc184629084)

[2. Lattice site analysis 3](#_Toc184629085)

[3. Spin Hamiltonian and IETS dI/dV spectra simulations 4](#_Toc184629086)

[4. Magnetic sensing 9](#_Toc184629087)

[5. DFT calculations 11](#_Toc184629088)

[6. ESR and fitting 17](#_Toc184629089)

[7. Rabi rate as a function of VRF 18](#_Toc184629090)

[8. Conductance-dependent spin lifetime 21](#_Toc184629091)

[9. Spin transport simulations and enhanced spin lifetime 22](#_Toc184629092)

[10. ESR transitions in a Heisenberg two-spin system with the tip field detuning effect 25](#_Toc184629093)

## Building FePc-Fe(C6H6) complexes

The FePc**-**Fe(C6H6)complexes were created using the atom manipulation scheme sketched in Fig. S1a. First, the tip is positioned above one ligand of FePc. The tip is then moved closer to the molecule and a bias voltage of is applied. Next, the tip is retracted from the surface with the FePc sticking to its apex. To drop off the molecule, we used two methods: 1) Perform Z-Spectroscopy starting with setpoints of pA and mV, gradually moving the tip towards the Fe atom. 2) Scan fast across the Fe atom at closer distance (, and scan speed of ). Figure S1b and S1c show the topographic images before and after building an FePc-Fe(C6H6)complex, respectively. Fig. S1d,e show additional cross sections across the complex, in which the protrusion at the position of the Fe atom becomes greatly visible. In Fig. 1a in the main text, we also showed multiple dimers of complexes. These were built using similar atom manipulation schemes. For two coupled FePc-Fe(C6H6)complexes, we build two complexes separately first and then move one towards the other. To move the complex, the tip is positioned between two ligands (, ), next moved closer to the surface and finally a bias voltage of was applied.


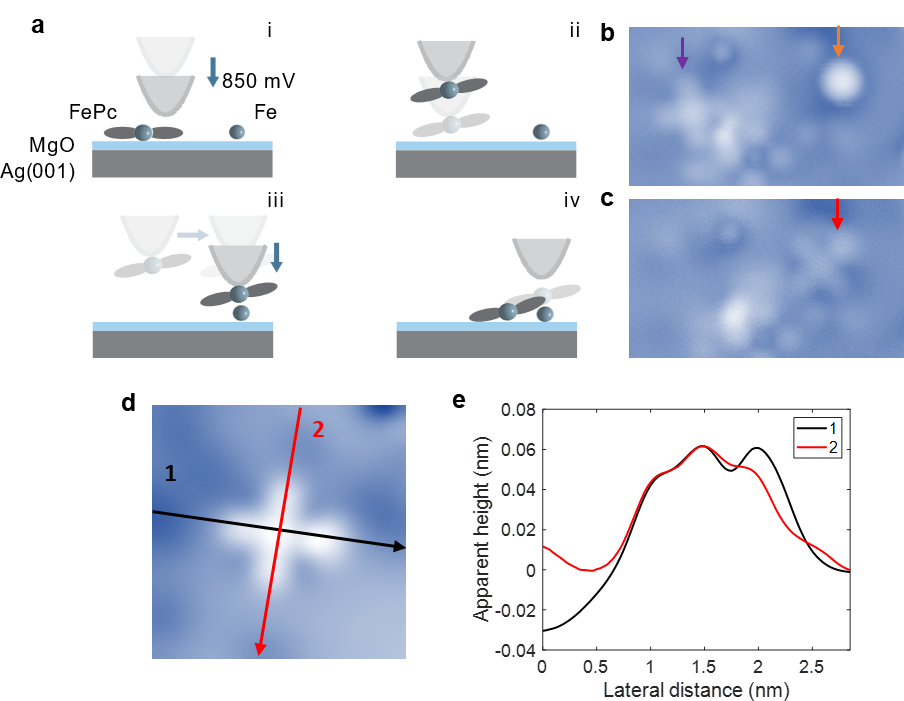


**Supplementary Fig. S1. a,** Schematic illustrating the manipulation procedures involved in building FePc-Fe(C6H6) complexes. **b,** Topographic image consisting of one Fe atom (orange arrow) and one FePc molecule (purple arrow) on 2ML MgO (, ). **c,** Topographic image afterwards with a newly formed FePc-Fe(C6H6) complex (red arrow). **d,** STM topography image (, ) and **e,** the corresponding line profiles comparing the ligands of the FePc-Fe(C6H6) complex with (black) and without (red) the Fe adatom underneath the benzene ring.

## Lattice site analysis

The FePc-Fe(C6H6) complexes adsorbed on 2ML MgO/Ag(001) tend to adopt specific site configurations. The precise positioning of the Fe atoms and FePc molecules with respect to the underlying MgO lattice is determined by atomic resolution images of the bare MgO area. In addition, the position of nearby individual Fe atoms, which are adsorbed atop a MgO oxygen lattice site1, is taken as a reference of the lattice. In Fig. S2a, the oxygen lattice is indicated by a white grid overlaid on the FePc-Fe(C6H6) complex structure. The Fe atom (marked in red) is situated at a distance of 0.64 nm (2×1 oxygen lattice sites) from the center of FePc. Consequently, both Fe and FePc are still adsorbed atop oxygen sites (Fig. S2b), as it is the case for the isolated atom and molecule1,2. These specific positions are used as the **
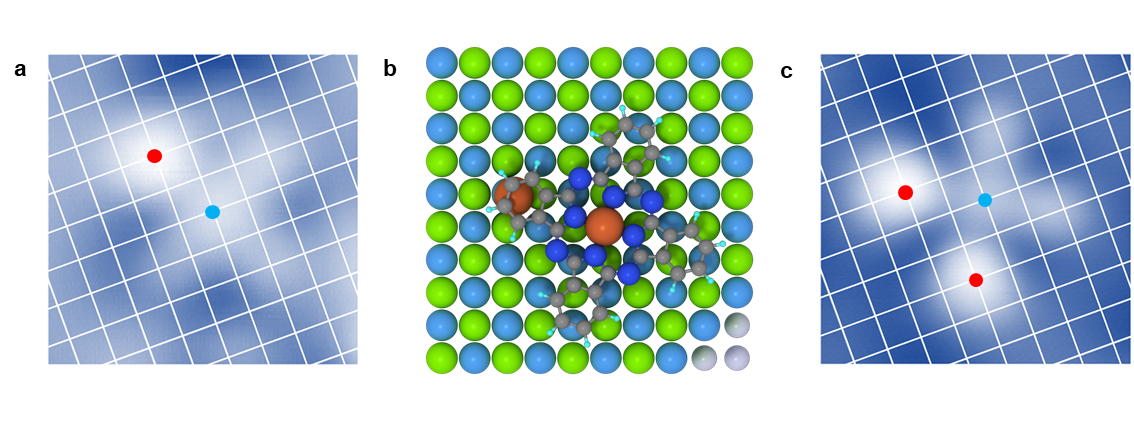
**basis for our DFT calculations.

**Supplementary Fig. S2. FePc-Fe(C6H6) complexes binding site. a,** Topographic image of an FePc-Fe(C6H6) complex with MgO lattice overlaid (2nm × 2 nm, setpoint: *V* = 100 mV, *I* = 20 pA). **b,** Top view image shows the stable configuration of the FePc-Fe(C6H6) complex calculated by DFT.The positions of Fe atom and molecule center are labeled by red and blue dots, respectively. The position of oxygen atoms in the MgO lattice is indicated by a white grid.

## Spin Hamiltonian and IETS dI/dV spectra simulations

In this section, we introduce the IETSd*I/*d*V* spectra simulations and investigate in detail the spin Hamiltonian described for the FePc-Fe(C6H6) complexes in the main text. When applying the external magnetic field in z-direction, we consider the following Hamiltonian for the complex:

|  |  | (3) |
| --- | --- | --- |

Where is the Heisenberg exchange coupling, is the out-of-plane zero-field splitting term of the Fe(C6H6) spin, is the Bohr magneton, is the external perpendicular magnetic field and and are g-factors of the Fe(C6H6) and FePc spins, respectively. In our case, and . The energies and eigenstates of this mixed spin-(1/2,1) system can be expressed analytically3. The eigen-energies are:

|  |  | (4) |
| --- | --- | --- |
|  |  | (5) |
|  |  | (6) |

whereas the corresponding eigenvectors are

|  |  | (7) |
| --- | --- | --- |
|  |  | (8) |
|  |  | (9) |

The probability amplitudes in the last four eigenvectors (8) and (9) are:

|  |  | (10) |
| --- | --- | --- |
|  |  |

For , the factors , .

At zero field (and ), this simplifies the energies to:

|  |  | (11) |
| --- | --- | --- |
|  |  | (12) |
|  |  | (13) |

This approximation nicely illustrates that the ground state energy is given by (assuming antiferromagnetic exchange, i.e. ). The wave functions of the ground state doublet are given as :

|  |  | (14) |
| --- | --- | --- |
|  |  |

The corresponding energy level diagram is shown in Fig. S3a (see also Fig. 2b). Two state manifolds form with and which are separated by an energy ~. The excited state quartet is further split by .
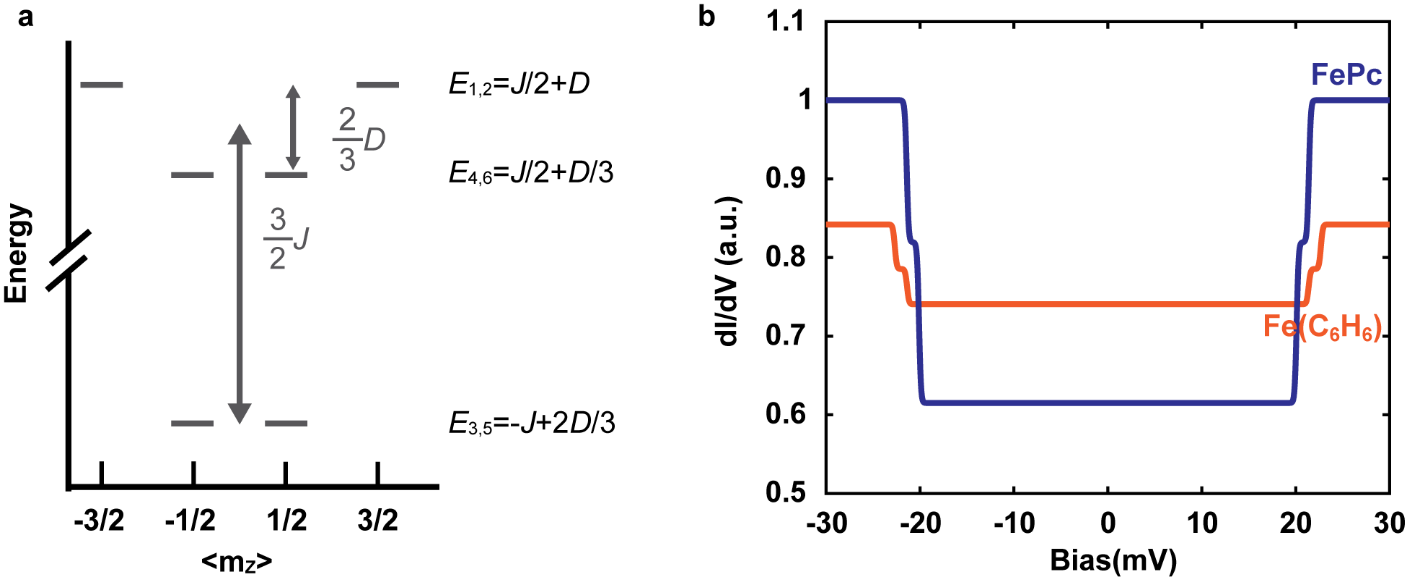


**Supplementary Fig. S3. a,** Energy level diagram of a mixed-spin (1/2,1) Heisenberg quantum ferrimagnet. **b,** Simulated IETS dI/dV spectra with S = ½ for FePc, S = 1 for Fe(C6H6). Fitting parameters: For Fe(C6H6): J = 14.65 meV, D = 1.9 meV, U = 0.945. For FePc: J = 13.8 meV. U = 0.494. T=0.8 K.

In the IETS simulations, we take the solution of the Hamiltonian described above to calculate the resulting tunneling current by using the spin simulation code developed in Ref.4,5 . The latter considers contributions to the tunneling current stemming from 1) potential scattering *U* and 2) inelastic scattering of the tunneling electrons. The values of parameters *,* and are adjusted for Fe(C6H6) and FePc in the complex to match the step heights and positions in the experiment: The simulated IETS dI/dV spectra shown in Fig. S3b (see also Fig. 1c) reproduce the double step feature found in the experimental data well.

The IETS calculations and the resulting d*I*/d*V* spectra are crucially influenced by the assumptions made in the initial spin Hamiltonian. As such, the IETS spectrum plays an important role to determine the spin state of the Fe(C6H6) in the complex. We screened a wide variety of cases and found that in particular the double step feature (along with constraints imposed by the results of the ESR measurements, remote sensing experiments as well as DFT calculations), can only be explained assuming and as shown in Fig. S3. In the following, we will exemplarily illustrate, how other reasonable spin models are not in agreement with the data.

1. **FePc: S = 1/2, Fe(C6H6): S = 2**

A first guess for the FePc spin state and the Fe spin would be adapting those of the individual spin systems, i.e. and . In this case, FePc and Fe(C6H6) retain their spin states as individual FePc (charged by one electron) and Fe on MgO. For the simulation, we initially assume that Fe has the same magnetic anisotropy (6) as for isolated Fe atoms and that there is Heisenberg exchange coupling between the two spins. For ferromagnetic coupling (), there are two IETS steps and the separation between these steps increases with increasing , while for antiferromagnetic coupling (), there are three IETS steps (Fig. S4). None of these simulations are consistent with the experimental results. Here, we exclude the E-term, which would otherwise potentially split the states and lead to additional steps. A similar double-step feature, consistent with experimental dI/dV, can be qualitatively reproduced by using D ~ 20 meV and |J| ~ 1. However, this is not consistent with our other experimental results, such as remote sensing experiments (Supplementary Section 4).

**Supplementary Fig. S4. Simulated dI/dV spectra of a coupled spin system consisting of a S=1/2 and a S=2.** For the system, we assume anisotropy parameters , **.** Left: Colormap of simulated spectra atop the system using different coupling strengths from to . Right: Selected spectra for , and . The spectra are shifted with an offset for clarity. Simulation uses0.2 K and 0 T.

1. **FePc S = 1, Fe(C6H6) S = 2**

In this case, we assume a spin of 1 for FePc, as it does in the gas phase, and that Fe retains S = 2. Moreover, we assume Heisenberg exchange coupling between them. An exemplary choice of different anisotropy and coupling parameters is displayed in Fig. S5 for coupling strength J ranging from -10 meV to 10 meV. We find that one can adjust J, D, and E-term to reproduce the double steps at around (Fig. S5), but there are more IETS steps at larger energies and always one step at around zero bias, which is absent in our experimental data.


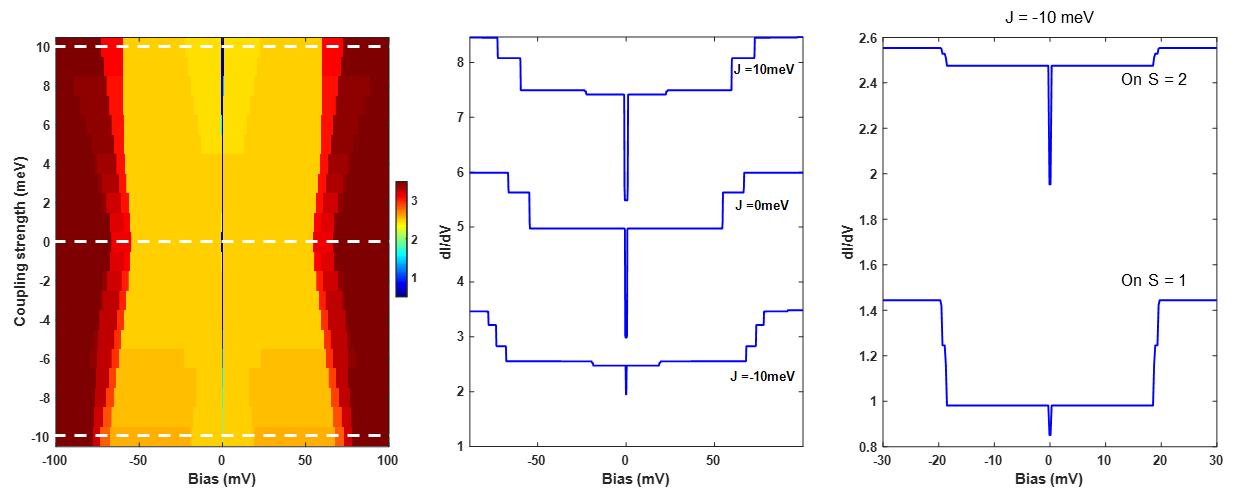


**Supplementary Fig. S5. Simulated dI/dV spectra of a coupled spin system consisting of a S=1 and a S=2.** Anisotropy parameters: , (for ) and , (for ) were exemplarily chosen, but a wide set of parameters was tested**.** Left: Colormap of simulated spectra for the system using different coupling strengths from to . Middle: Selected spectra for , 0 and . Right: Zoom in plot for both FePc and Fe with , showing two IETS steps at around . The spectra are shifted with an offset for clarity. Simulation uses0.2 K and 0 T.

Besides the cases illustrated here, we also tested for instance a spin S = 1/2 coupled to a spin S= 3/2 or 5/2, which always results in more than two IETS steps or of two steps with incorrect position or intensity. Further constraints on the spin system will be discussed in section S4 and S5, which is only fulfilled by the spin model proposed and discussed at the beginning of this chapter.

## Magnetic sensing

To gain further insight into the spin state and magnetic moment of the Fe(C6H6) in the complex, we used a close-by single Fe atom as a magnetic sensor to sense the complexes magnetic field7. The magnetic dipole–dipole interaction between the sensor Fe atom and the target spin causes a change of the resonance frequency of the sensor Fe, that is shifted to higher or lower frequencies depending on the spin direction and whether it is in its ground or excited state. Due to its large magnetic anisotropy, the magnetic moment of the sensor Fe is oriented out-of-plane along the applied magnetic field. Therefore, only the z-component of the target magnetic moment is measured and the frequency difference between its ground and excited state is given by7

|  | (15) |
| --- | --- |

where is Planck’s constant, is the vacuum permeability and is the distance between the two magnetic moments and . In the experiment, the ESR signals are measured using tip-field sweeps8,9.

As a reference, we first measured the ESR signal of a single Fe atom that shows a single resonance peak (Fig. S6, top). Second, we investigated an Fe-Fe dimer with a distance of . The splitting of the resonance peak is (Fig. S6, middle). From this, the magnetic moment of Fe is determined to be , which agrees well with previous measurements of 7. This good agreement indicates that magnetic dipole-dipole interaction is dominant at this distance, despite the close distance between the two spins - below 1 nm. Here, exchange interaction can often contribute significantly to the coupling7.

Next, we position a sensor Fe atom 0.91 nm from the Fe site of the complex, the same distance as in the previous experiment. The influence of the FePc spin is negligible as its distance to the sensor Fe is roughly twice that of the Fe(C6H6) in the complex. We find a frequency splitting of , which is roughly half of the frequency splitting observed for a single Fe atom at the same distance. This corresponds to a magnetic moment of . This significantly smaller magnetic moment is incompatible with a of the Fe atom. While the value of 2 , indicative of a spin 1 system without orbital contributions, is still within the error bar, we believe that likely exchange interaction is increasing the splitting due to the small distance between sensor and target2,7. This subsequently leads to a higher apparent magnetic moment in the sensing experiments.

Consequently, this reduction strongly suggests that the spin state of Fe(C6H6) in the complexes is lower than S = 2.


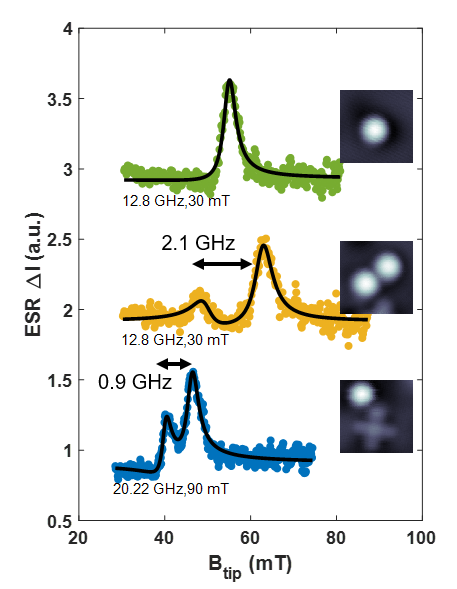


**Supplementary Fig. S6. Magnetic sensing experiment.** Tip-field sweep ESR measurements on a single Fe (green), a sensor Fe atom close to another Fe (yellow) and a sensor Fe atom close to the Fe(C6H6) of an FePc-Fe(C6H6) complex (blue). All data was taken with the same magnetic microtip. Insets: topographic images (size: 2 nm 2 nm). The inserted numbers display the used external field and RF frequency for the tip-field sweep. The resonance peaks are split by 2.1 GHz (yellow) and 0.9 GHz (blue), respectively. A linear background was subtracted from the data stemming from a general increase in signal with increase of the setpoint current. The black line indicates fits to one or two Lorentz functions.

## DFT calculations

1. **Details of DFT parameters**

All periodic-cell density functional theory (DFT) calculations were performed using plane-wave basis and pseudopotentials in Quantum Espresso version 7.110,11. All pseudopotentials use the Perdew–Burke–Ernzerhof (PBE) parametrization for the exchange and correlation potential12. We mimic the experiment by placing the Fe on top of MgO (100) which is supported by a silver (100) substrate. The bulk lattice constants for silver and MgO with PBE are aAg = 4.16 Å and aMgO = 4.25 Å, which results in a lattice mismatch of about 2% (experimental value: 2.9%12). To construct the surface slab, we used 4 layers of Ag with the lateral lattice constant fixed to that of the PBE bulk silver and added up to 2 layers of MgO. We created lateral supercells of about 20x20 Å and 15 Å of vacuum were used to pad the cell in z-direction. All calculations used a k-grid equivalent to 15x15x1 k-points of the 1x1x1 unit cell. All 3d plots in the main text were created using OVITO ref. 13.

1. **A Fe(C6H6) toy model**

To qualitatively understand the effect of Fe with an FePc ligand ring atop, we employ a toy model by placing a benzene ring on top of the Fe atom (as in Fig. 1d/1e but without MgO). Our DFT calculations show that without the presence of a benzene ring, the Fe *d*-states of individual Fe atoms are mostly found close to the Fermi level. For Fe with benzene ring atop, Fe(C6H6), the crystal field generated by the benzene ring leads to a change of the orbital order and spin state that leads to bonding between Fe and (C6H6) and new molecular orbitals. Combining simple molecular orbital theory with our DFT (Fig. S7), we find a strong overlap between the benzene E1 orbitals and , of the Fe, forming a strong set of -bonds. This is also commonly the case for other metallocenes14 and also rationalizes the stability of the Fe(C6H6) complex. Similarly, the frontier orbitals are formed by an overlap between , and the (C6H6) E1 antibonding states. Still, the frontier orbitals maintain a strong *d*-character (Fig. S8a). For instance, the -, -like orbitals account for 76% of 2e1 near .


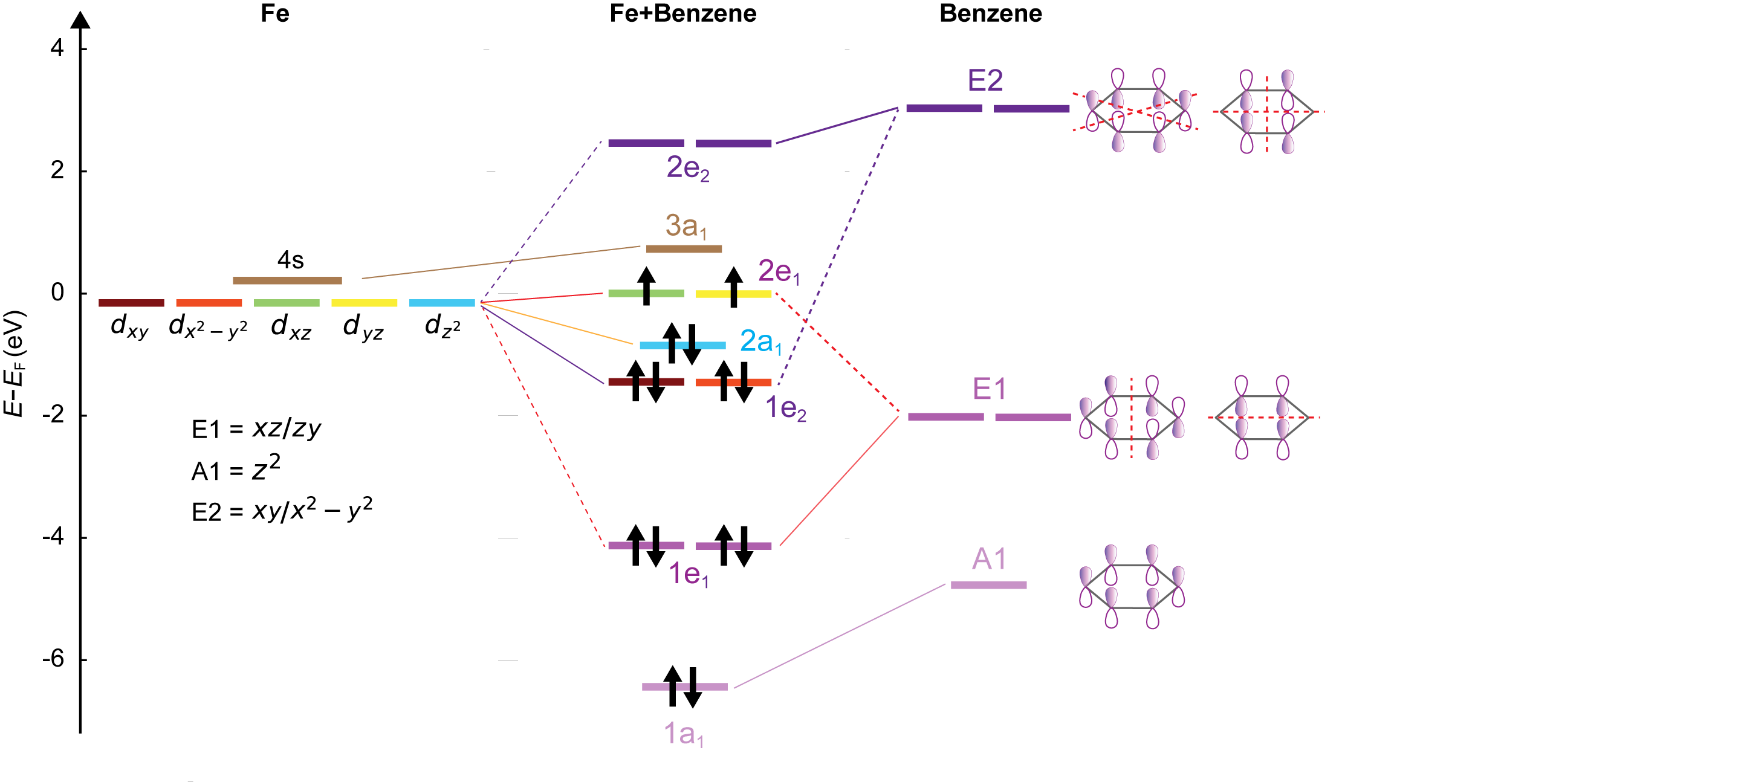


**Supplementary Fig. S7. Molecular orbital energy diagram of Fe and Benzene (in vacuum).** On the left side, Fe 3*d* and 4*s* states are shown with their respective symmetry group, on the right side the molecular orbitals of benzene. In the center the combined molecular orbitals of Fe(C6H6) are shown. The lowest lying states are dominated by the benzene states (1a1 90%; 1e1 84%) with some overlap of the 3*d* and 4*s* states. For the higher ones, the main contribution stems from the *d* states (1e2 72%; 2a1 93%; 2e1 76%). Energies and orbital character are obtained from DFT calculations. The addition of the MgO/Ag(001) surfaces leads to further hybridization of all states (See supplementary Fig. S8).

1. **DFT calculations of the full system**

We first confirmed that DFT accurately reproduced S = 2 of individual Fe atoms on the MgO/Ag(100) surface as discussed elsewhere15. From the local density of states (LDOS) in Fig. 1d, the Fe -states are mostly found close to the Fermi level with the orbital strongly hybridizing with the orbital. This hybridization results in the orbital being half-filled due to on-site repulsion. As a consequence, Fe has a final electron occupation of obtained from a Lowdin charge analysis and four orbitals (/) are close to being half-filled (SupplementaryTable 1). This consequently indicates a spin , consistent with previous works1,15. To understand how the Fe(C6H6) spin state in the complex becomes , we employ again the simple model by placing a benzene ring on top of the Fe atom (Fig. 1e). We find that the benzene ring does not change the charge state of the Fe atom: Here, Fe exhibits a configuration, indicating no significant charge transfer (SupplementaryTable 1). However, the crystal field generated by the benzene ring changes the orbital order: the , and like orbitals are now shifted and lowered in energy, and the hybridization is eliminated due to the depletion of the 4s in the presence of benzene ring. Consequently, only the / like orbitals are close to the Fermi energy and half-filled, suggesting an Fe spin state of .

| Configuration |  |  |  |  |  | total |
| --- | --- | --- | --- | --- | --- | --- |
| Fe () | 0.9263 | 0.9965 | 0.9962 | 0.9962 | 0.9836 | **4.9** |
| Fe () | 0.5274 | 0.0034 | 0.0472 | 0.0472 | 0.9628 | **1.6** |
| Fe+benzene () | 0.8525 | 0.8542 | 0.959 | 0.9592 | 0.8386 | **4.5** |
| Fe+benzene () | 0.6793 | 0.6932 | 0.1314 | 0.1323 | 0.6826 | **2.3** |

**Supplementary Table 1**. Filling of the 3*d* shell obtained from a Lowdin charge analysis for Fe on 2ML MgO/Ag(001) without and with a benzene ring on top.

To shed light on the role of the substrate, we compare Fe-benzene formation in vacuum and on the MgO/Ag(001) surface (Figure S9). While there is more overlap with other states, the simple molecular orbital picture derived from the toy model still remains valid: Figure S9 shows that both deliver similar results. However, the surface decreases the energy splitting between *d* states and further mixes the states by hybridization with the substrate.

DFT calculations including the full FePc molecule do not change our observations (see Fig. S9). The 3*d* states near the Fermi level show a similar trend to Fe(C6H6), however the tilted final geometry makes the analysis of the orbital character of the Fe 3*d* states less straightforward.


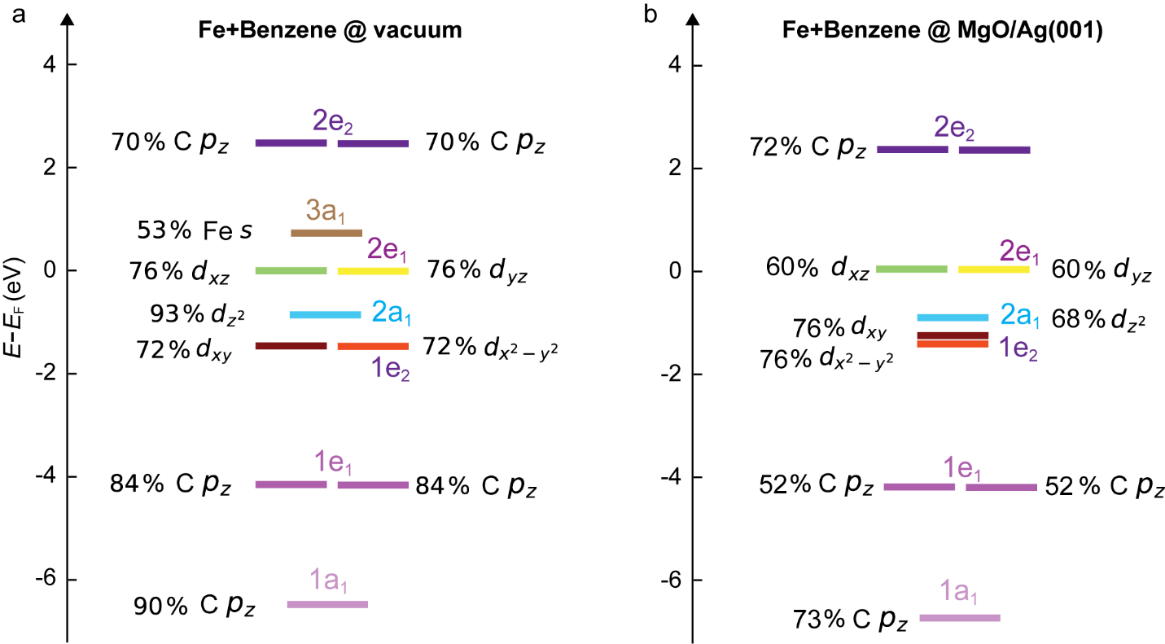


**Supplementary Fig. S8. Molecular orbital energy diagrams of Fe(C6H6) in different environments. a,** in vacuum and **b,** on a MgO/Ag(001) substrate. The orbital weights are given in percent (%) listing the orbital of the dominating weight. The remaining contributions to 100% are hybridizations with other orbitals. Energies and character are obtained from DFT calculations.


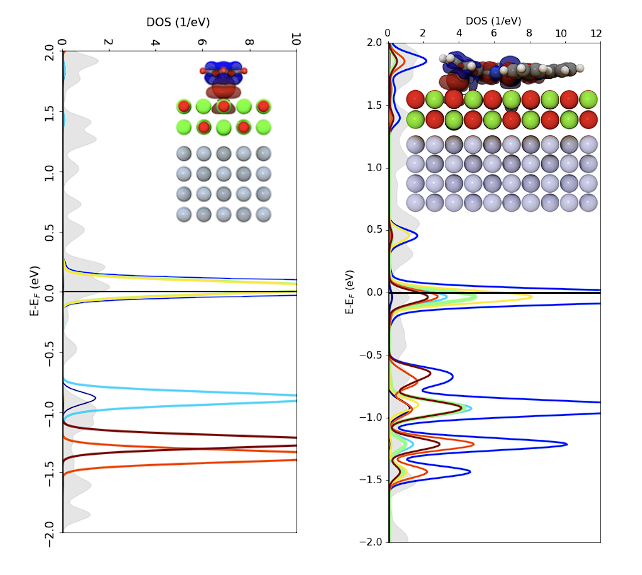

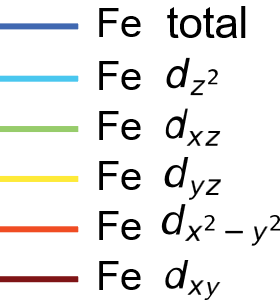


a

b

**Supplementary Fig. S9. Atomic orbital projected DOS of Fe(C6H6) and FePc-Fe(C6H6). a,** Fe 3*d* orbitals in the Fe-benzene complex used in the main text. **b,** the same plot but now with an FePc-Fe(C6H6) complex. The resulting states show more mixing but the behavior of the states close to *E*F follows a similar trend as in a.

1. **Exchange interaction within the complex**

We use DFT calculations of an FePc-Fe(C6H6) complex to estimate the exchange coupling between the two spin centers using the broken-symmetry approach2,16. The magnetic exchange coupling strength is obtained by comparing the energy of the high spin (HS) and low-spin or broken symmetry (BS) states as:

The high-spin solution corresponds to FM coupling whilst the BS solution is obtained from an antiferromagnetically coupled configuration and is the total spin of the high-spin state. We obtain an exchange coupling for the Fe-FePc complexes of around 7 meV, which is of the same order as the experimental results (14 meV). We emphasize that this is the largest observed for spins on MgO and is mediated via the FePc ligand and by far exceeds the exchange coupling of two Fe atoms at the same distance but without the ligand. This indicates that the exchange coupling is mediated through the ligand as also observed in FePc-FePc dimers2 and FePc-Ti dimes17. We confirm that the exchange coupling in this system is strongly mediated by the ligand by slowly lifting the ligand up from the Fe atom in the calculation (Fig. S10). In such a model, the exchange coupling constant is approximately exponentially dependent on the Fe atom – ligand distance. As the distance increases by tilting the ligand from 0° to 20°, the exchange coupling J decreases exponentially from 7 meV to 0.29 meV.


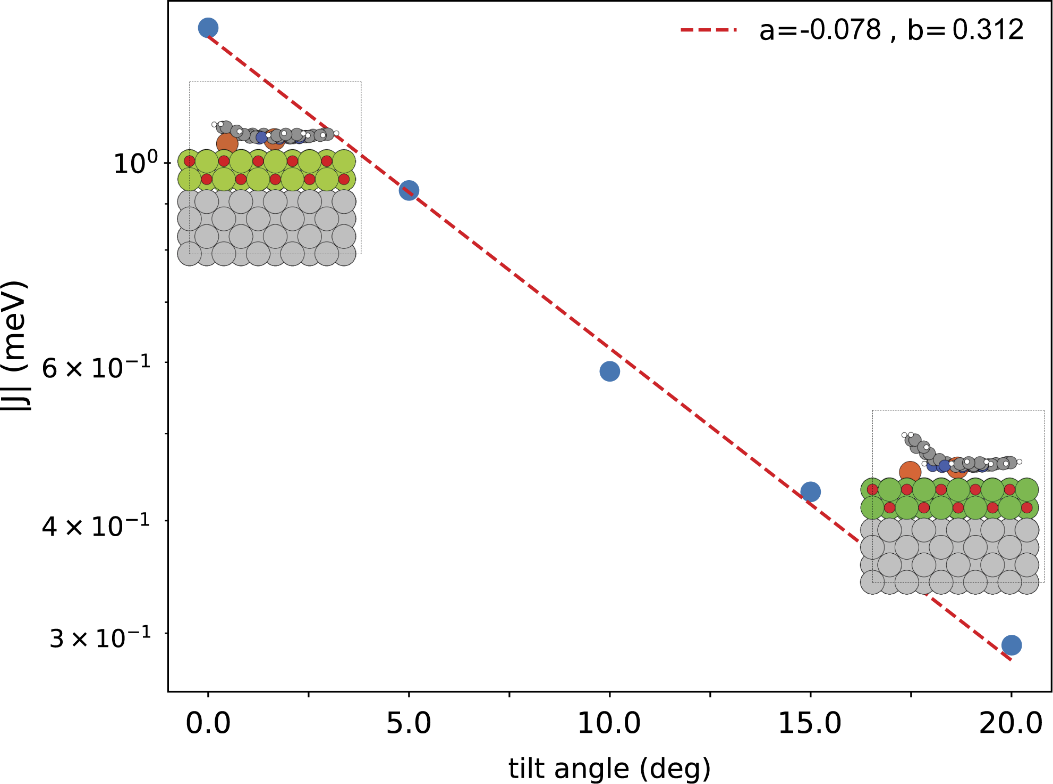


**Supplementary Fig. S10. Exchange energy as a function of Fe atom – ligand distance.** Inset: sketch showing 0° (left) and 20°(right) tilt angle configurations. The red dash line is a linear fit to data in log scale.

## ESR and fitting

Figure 2(e-f) in the main text show the external magnetic field dependent ESR measurement at the FePc site and Fe(C6H6) site of the same FePc-Fe(C6H6) complex with the same tip. Fitting linearly as a function of gives the magnetic moment of (1.008±0.007) µB at the Fe(C6H6) site (Fig. S11a) and (1.004±0.012) µB at the FePc center (Fig. S11b), which is consistent to the effective spin ½ ground state doublet. Figure S12c shows the magnetic moments at both sites obtained for different FePc-Fe(C6H6) complexes, giving an averaged magnetic moment of . While this is close to an effective magnetic moment of 1 , the variations are larger than the individual errorbars. We suggest that this results from the influence of the magnetic tip field18 as well as changes in the local environment of the spin center, i.e. given by defects and
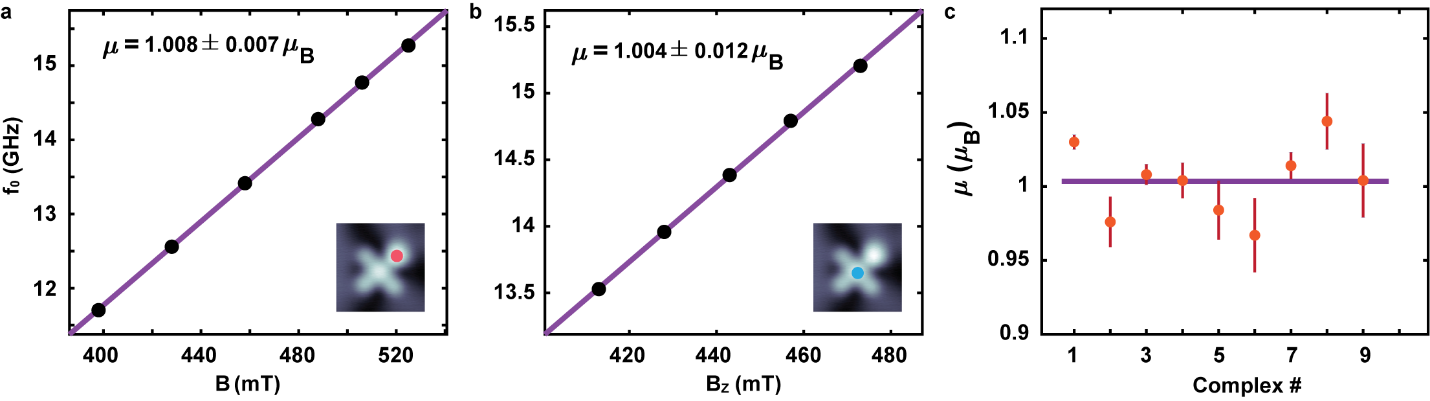
strain in the substrate.

**Supplementary Fig. S11. Magnetic moment of FePc-Fe(C6H6) complexes.** Resonance frequency as a function of an out-of-plane external magnetic field **a,** Fe(C6H6) site ( / ); **b,** FePc site ( / ) extracted from Fig. 2e,f in the main text. **c,** Statistics of magnetic moments in different FePc-Fe(C6H6) complexes.

## Rabi rate as a function of VRF

We extract the Rabi rate at different from Fig. 3b in the main text, and a linear fit yields a slope of (Fig. S12). This slope is 5 times higher than that of pristine FePc [ in Ref.19] and 3-7 times larger than values reported for Ti atoms [ in Ref.20 and in Ref.21]. In the following we discuss possible reasons for these results.


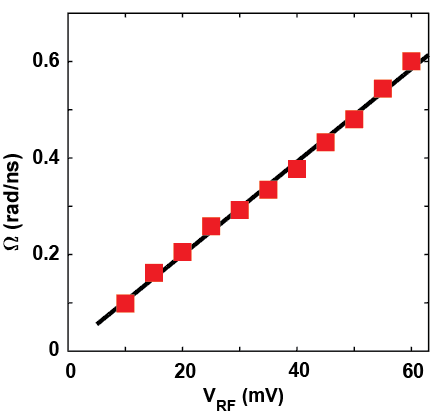


**Supplementary Fig. S12.** Extracted Rabi rate Ω as a function of VRF from Fig. 3b in main text. The black line is a linear fit to the data with a slope of .

The driving mechanism of individual atoms and molecules in ESR-STM is still subject to current research, both theoretically and experimentally21-25 . We first discuss the ESR driving mechanism in the framework of the frequently employed piezoelectric displacement model22, which relies on the displacement of the surface spin and a subsequent modulation of one of the parts of the Hamiltonian. Employing the same formalism as presented in Ref. 22, we write

where the Rabi rate depends on the oscillating displacement and the Rabi force . The latter can have different origins22. The dominating term was found theoretically22 and experimentally20 to originate from exchange interaction of the tip magnetic moment and the surface spin leading to an effectively oscillating local magnetic field. Thus, a higher Rabi rate can originate either from an increase in or .

A straightforward description of the displacement is given by

Here, it is assumed that the time-dependent electric field couples via Hooke’s law to the surface spin with an effective charge and effective spring constant , i.e. the stiffness of the vibrational mode of the spin center on the surface.

Thus, a larger displacement can either be caused by a different of the surface spin, a less stiff interaction to the surface , or simply a different initial distance between the surface spin and the tip.

In addition, the Rabi force itself is potentially stronger for the Fe(C6H6) site in the complex:

Here, is the gradient of the exchange interaction between the surface spin and the tip magnetic moment . is the transition matrix element, emphasizing that a finite overlap between two states is necessary for their connection. Thus, both and can cause an increase in . While the former is difficult to estimate, the latter can be calculated from the Hamiltonian of the FePc-Fe(C6H6) complex given in the main text for the Fe(C6H6) site. When comparing this to a normal spin ½, we find a 33% increase (see Supplementary Table 2). This increase is very likely to play a role in the faster Rabi rate observed for the FePc-Fe(C6H6) complex, but cannot explain the full effect.

Beyond the piezoelectric displacement model, it was proposed by some of the authors24, that the electric field of the tip can directly modulate the charges of the atoms without displacement. This leads for spin dimers to a modulation of the J-coupling and thus explains experimental work on Fe-Ti spin pairs quite well21. Thus, for the FePc-Fe(C6H6) complex, J-modulation between the Fe and FePc spin adds another possibility for a higher Rabi rate.

Lastly, in another recent work, some of the authors proposed an electron transport model26, which predicts that the magnitude of the Rabi term mainly depends on tip polarization and the DC bias magnitude compared to the ionization energy of the adsorbate. In particular, the latter changes for the new molecular orbitals emerging in the complex (Fig. 1e).

In general, we believe that a combination of the different origins discussed here play a role for the enhanced Rabi rate: This includes the summarized effects to the displacement , differences in the Rabi force, the strong exchange coupling as well as a change in ionization energy in the dimer.

| Matrix Element | Spin ½ (FePc) | Spin (1, ½) Ferrimagnet (Complex) |
| --- | --- | --- |
|  | 0.5 | 0.667 |
|  | 0.5 | 0.667 |
|  | 0 | 0 |

**Supplementary Table 2.** Table of transition matrix elements of the respective ESR transition for different spin systems. For the FePc-Fe(C6H6) complex, the transition matrix element is determined for the Fe site which corresponds to the case in the Rabi measurements.

## Conductance-dependent spin lifetime

To further investigate the processes that limit the spin lifetime , we performed pump-probe measurements as a function of tip-sample conductance, , for both pristine FePc (Fig. S13a) and FePc in the complex (Fig. S13b). In both cases, the lifetime drops dramatically as the tip approaches the spin centers. At large tip-sample distances (i.e. low ), reaches a plateau where it becomes independent of tip-sample distance. This plateau, defined as , is also independent of the specific tip and molecules in use. We therefore conclude that represents the intrinsic relaxation lifetime on a 2ML MgO surface. The effect of the tip height on can be understood by a model based on electron-hole generation in the nearby electrodes, i.e. the metallic substrate and tip, as described in Ref.27 for single Fe atoms on MgO/Ag(001). According to this model, is a function of sample–sample (), tip–sample () and tip–tip () conductance: (Fig. S13c). Fitting *T*1 as a function of yields of for pristine FePc (solid blue curve in Fig. S13a) and for the complex (solid red curve in Fig. S13b). In Figure S14d, we show the longest achieved at a large tip-sample distance ( ). The data reveals a of ns for FePc in the complex and ns for pristine FePc, which are consistent with the values from our model. At large tip-sample distance, the lifetime is limited by the sample-sample conductance . We believe that can be further enhanced by increasing the MgO layer thickness as it is the case for individual Fe atoms27.


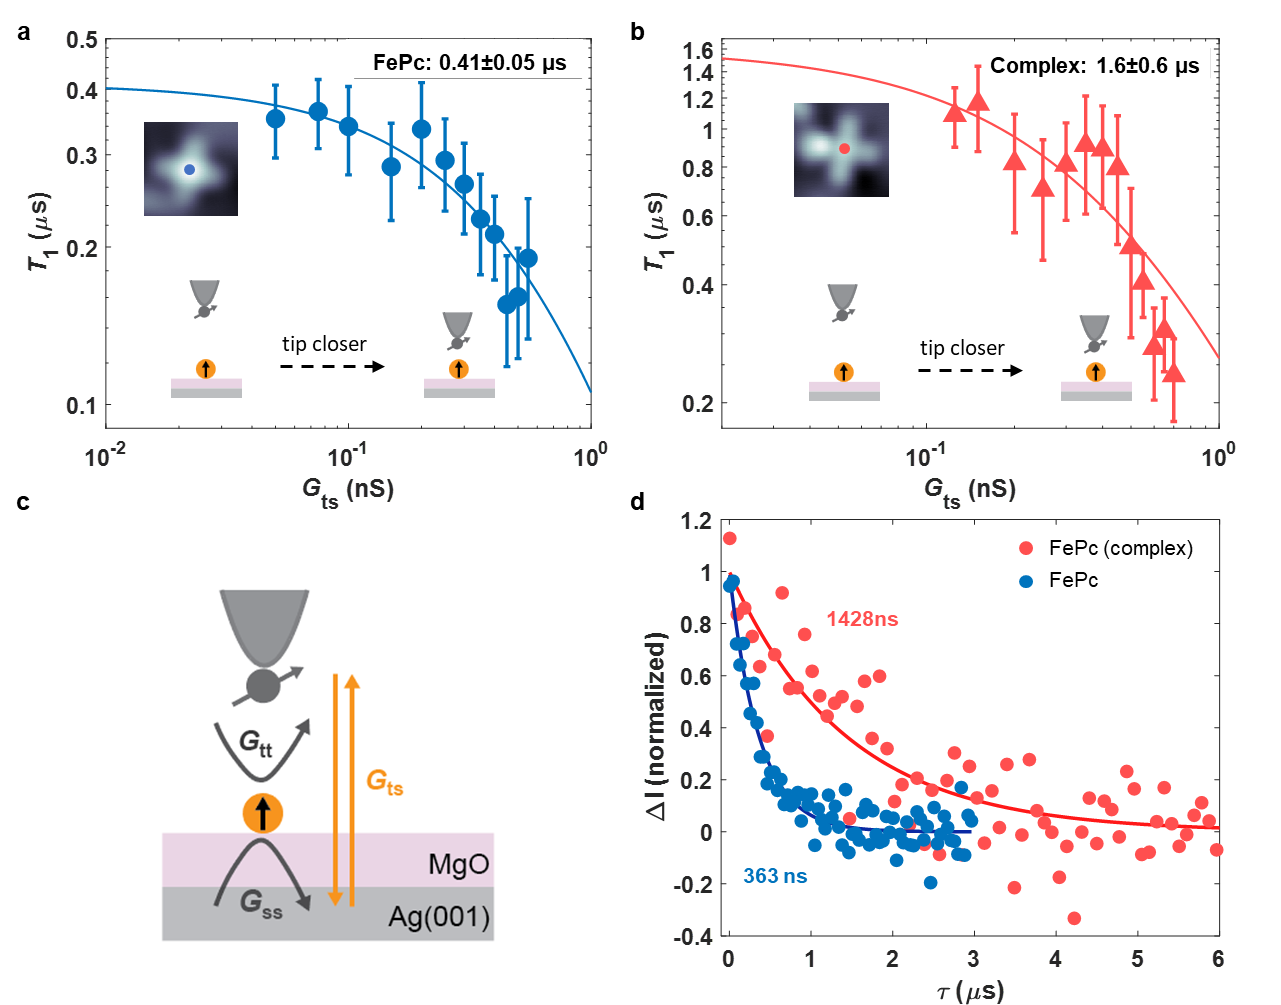


**Supplementary Fig. S13. Conductance-dependent spin lifetime *T*1 as a function of tip-surface conductance**. **a**,**b** *T*1 as a function of tip-surface conductance for pristine FePc and FePc site in the complex. (setpoint: , for FePc, for the complex). All data are measured with the same tip. Error bars are determined by exponential fits to pump–probe data. The solid lines are fits. Fitted parameters: , (complex), and (FePc). **c**, Illustration of tip–tip (), tip–sample () and sample–sample () conductance paths. Their relative strength can be tuned by adjusting the distance of the metallic tip to the spin. . **d**, *T*1 for a pristine FePc (blue) and FePc in the complex (red) on 2 ML MgO/Ag(001) at low . [parameters: , , ,, (FePc site in the complex), (FePc)].

## Spin transport simulations and enhanced spin lifetime

1. **Spin transport simulations**

In the following, we discuss the spin transport simulation in greater detail. These are employed to explain the improvement in spin lifetime, which in the main text, we ascribe to the correlation of the two spins in the complex. For a electron tunneling process through an STM tunnel barrier featuring a single spin, the intensity of the transition from a given initial state to a final state , i.e. the transition matrix element, is given as (Eq. 13 and 14 in Ref.5)

|  | (15) |
| --- | --- |

Here, () describes states of the electron baths (spin system). The interaction between the tunneling electron and the localized spin is described as an exchange interaction of the form . Here, and are the spin vector operators of the local spin and the tunneling electron, respectively. The (dimensionless) parameter accounts for spin-independent components of the interaction, i.e. Coulomb potential scattering. also contains the inelastic scattering between the two spins. Fig. S14 illustrates the composition of the different contributions to a d*I*/d*V* measurement including elastic and inelastic channels as derived in Ref.5. From the d*I*/d*V* measurement, the ratio of inelastic scattering (blue area in Fig. S14) and spin conserving transport processes can be determined in an external magnetic field. In order to obtain the probability for inelastic scattering we thus simulated both FePc and complex spectra and extracted the ratio between inelastic and elastic tunneling channels. We take the spin configuration from the d*I*/d*V* and ESR analysis performed in the main text (Complex: , , , , , ; isolated FePc: , taken form Ref.2). In the simulation, we additionally apply a magnetic field of 5 T in order to separate inelastic and elastic contributions at around zero bias (As shown in Fig. S15a). The exemplary ratio from these simulations are shown in Fig. S15a for both the complex and the pristine FePc. As it can be seen, the probability of inelastic scattering, i.e. the height of the IETS step is significantly reduced for the complex, in particular for the FePc site. In Fig. 3f in the main text we show the continuous evolution of this ratio as a function of exchange coupling between the two spins, which tunes the system continuously from the pristine FePc into the ferrimagnet configuration. Compared to pristine FePc, the reduction in inelastic spin-flip fraction for FePc in the complex is mostly attributed to the large *J* which leads to strong correlation between two spins, as the *U* parameter remains similar for them. This emphasizes that the correlation in the spin system is crucial to protect the spin from inelastic scattering contributions in the environment. While these simulations are based solely on the parameters extracted from the zero-field d*I*/d*V* spectra measured with non-spin polarized tips, we can additionally obtain these fractions from experimental d*I*/d*V* spectra which are discussed in the following section.

**Supplementary Fig. S14. Simulated tunneling spectra for a S=1/2 system at different magnetic fields.** The different contributions to the conductance are labeled. Blue: Conductance due to inelastic spin-spin scattering with changing the localized spin, Dark gray: elastic spin-spin scattering without changing the spin, light gray. Elastic Coulomb potential scattering with. The spectra are normalized and g = 2 here. T was set to 0.5 K.


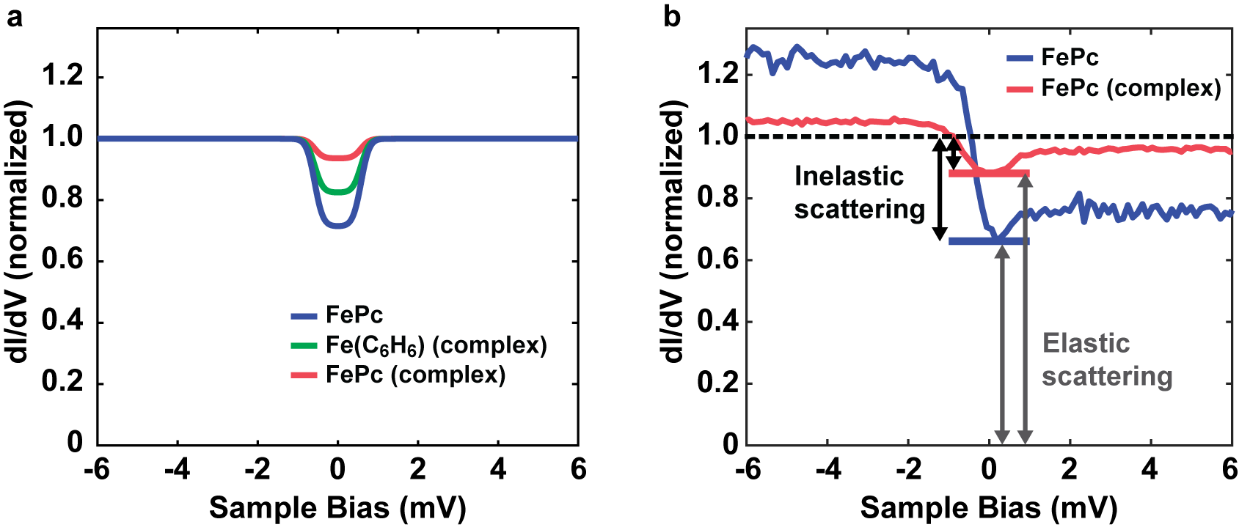
**Supplementary Fig. S15. Inelastic Scattering in d*I*/d*V*. a,** Simulated dI/dV of FePc and of the complex: , , , , , ; isolated FePc: , taken form Ref. 2 . T = 0.8 K, B = 5 T.  **b,** Normalized d*I*/d*V* measurements with a spin-polarized tip to determine the fraction of inelastic scattering for the pristine FePc, as well as Fe(C6H6) and FePc in the complex. Data taken with a magnetic tip, in order to induce a large Zeeman splitting (Tunneling Parameter: FePc: / ; FePc (complex): / ).

1. **Experimental determination of inelastic scattering probability**

Besides the spin transport simulations, which offer a detailed picture of the influence of the exchange coupling and correlation on inelastic scattering processes, we can also experimentally determine the probability of inelastic scattering by performing d*I*/d*V* measurements on the FePc and the complex.

Fig. S15b shows d*I/*d*V* spectra, which were recorded using a magnetic tip with a field strong enough to split the doublet ground state. Usually, an external magnetic field is used for this kind of measurements, which however in our experimental setup is not strong enough to sufficiently split the two states. The spectra in Fig. S15b include both the isolated FePc and measurements on the FePc site in the complex. For all spectra, the signal above the inelastic transition is asymmetric for different bias polarity due to the additional spin-polarization of the magnetic tip5. Thus, we normalize the spectra to the average of the two step heights, which corresponds to the level in the non-spin-polarized case. As can be seen, the fraction of inelastic scattering (blue) is largest for FePc, and decreases for the FePc site in the complex. The ratio of inelastic scattering can be read off and is shown for different measurements (different FePcs/complexes and different tips) in the main text in Fig. 3f.

## ESR transitions in a Heisenberg two-spin system with the tip field detuning effect

In the main text, we argue that the two coupled complex spins (four spins) can be treated effectively as two coupled spin ½, such as found in Ref. 2,28. In the following, we will derive the essential equations necessary to describe the two coupled complexes as effectively two coupled spin ½. Moreover, we will discuss the antiferromagnetically (AFM) coupled case, in contrast to the ferromagnetically (FM) case discussed in the main text.

Using the secular approximation, the Hamiltonian in the main text can be rewritten as

Here z is aligned with , is the Bohr magneton, and and represent the exchange and dipole coupling strengths, respectively. Labels 1 and 2 indicate the first and second complex. Thus, the first two terms are the Zeeman splittings of the respective complexes. The detuning, i.e. the difference between the Zeeman splittings of the two complex spins, is given by the imbalance of these two terms, i.e.
. The coupling constant for the dipolar coupling is given by with , where are the gyromagnetic ratios of the two complex spins. Here, 90° represents the angle between the external field and the connection vector of the two complex spins, resulting in . The magnetic dipolar coupling treats the effective coupling between the two complex spins. Using Zeeman product states as a computational basis, the eigenstates and corresponding eigenenergies of the coupled complex Hamiltonian are:

| n | Eigenstate | Eigenenergy |
| --- | --- | --- |
| 0 |  |  |
| 1 |  |  |
| 2 |  |  |
| 3 |  |  |

The coupling terms cause the formation of two mixed states and , which are a superposition of the two Zeeman states and and can be characterized by the parameter , which depends on the detuning and the exchange coupling .

Four possible transitions could occur, labeled by the corresponding ESR frequencies: for , for , for and for .

These four transitions are those shown in Fig. 4c-f in the main text and in Figs. S17-19. The frequency difference between and depends on and given by:

.

When the exchange coupling is dominant, can be either positive (, AFM coupling) or negative (, FM coupling). In the main text, we demonstrate that the two complex spins are coupled ferromagnetically. However, they can also be coupled antiferromagnetically when the two Fe(C6H6) in each complex are positioned close together. The coupling sign can be determined by comparing the relative ESR peak heights of and . Since for the AFM case (Fig. 4 and Fig. S16) the ESR peak at coresponds to the ground state of the neighboring complex spin (the spin under the tip), the ESR peak at is taller than at . In the FM case, the mixed states and move to higher energies, causing to appear at a higher frequency than . Generally speaking, the peak at lower frequencies is taller for AFM (Fig. S17), while it is at higher frequencies in the FM case (Fig.4).


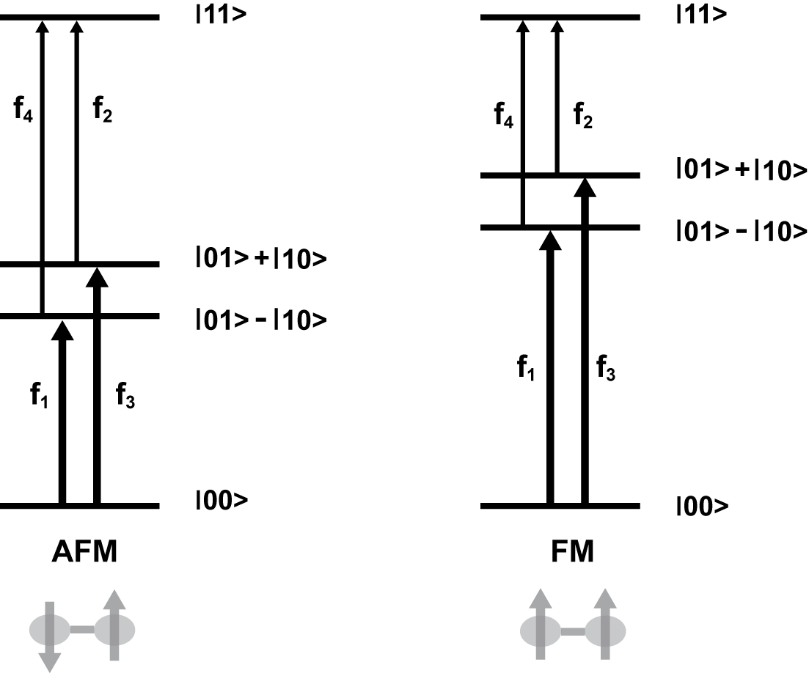


**Supplementary Fig. 16. Energy levels of a pair of AFM or FM coupled spin 1/2.** The arrows indicate the possible ESR transitions. The frequency and intensity are represented by the length and thickness of the arrows. The peak at lower frequencies ( or ) is taller for AFM, while it is higher in the FM case.


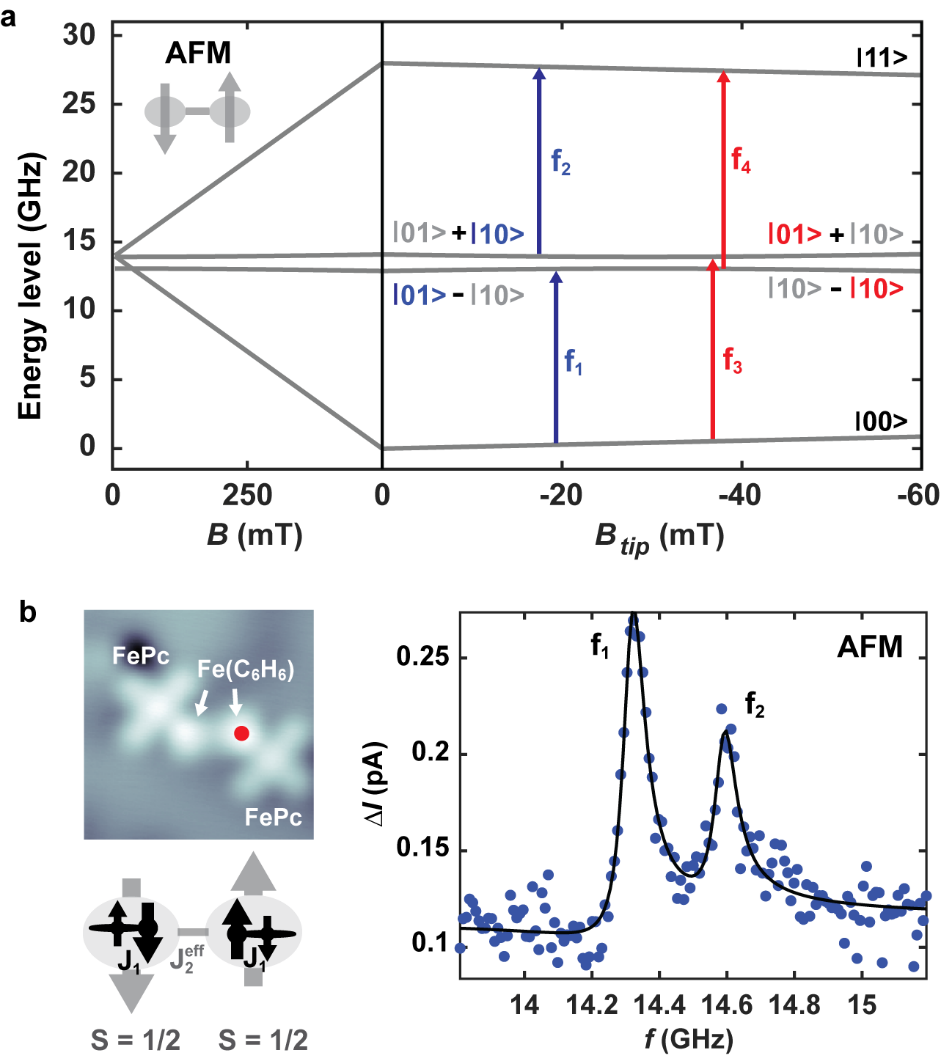


**Supplementary Fig. S17. AFM Coupling in a Dimer of Complexes. a.** Energy level diagram of two AFM coupled spin ½ in the presence of and . **b.** Topographic image of two coupled complexes built by atom manipulation (, , image size: ). The two Fe atoms in the complexes are closest together. **c.** The ESR spectrum measured on Fe site in the right complex marked by red dot in b. (, ,,)

The qualitative behavior of the ESR peaks at the point of no detuning can be understood by considering the frequency difference between the second and third ESR resonance, specifically ( and in AFM (FM) case:

Since , we have for :

(, AFM)

( , FM)


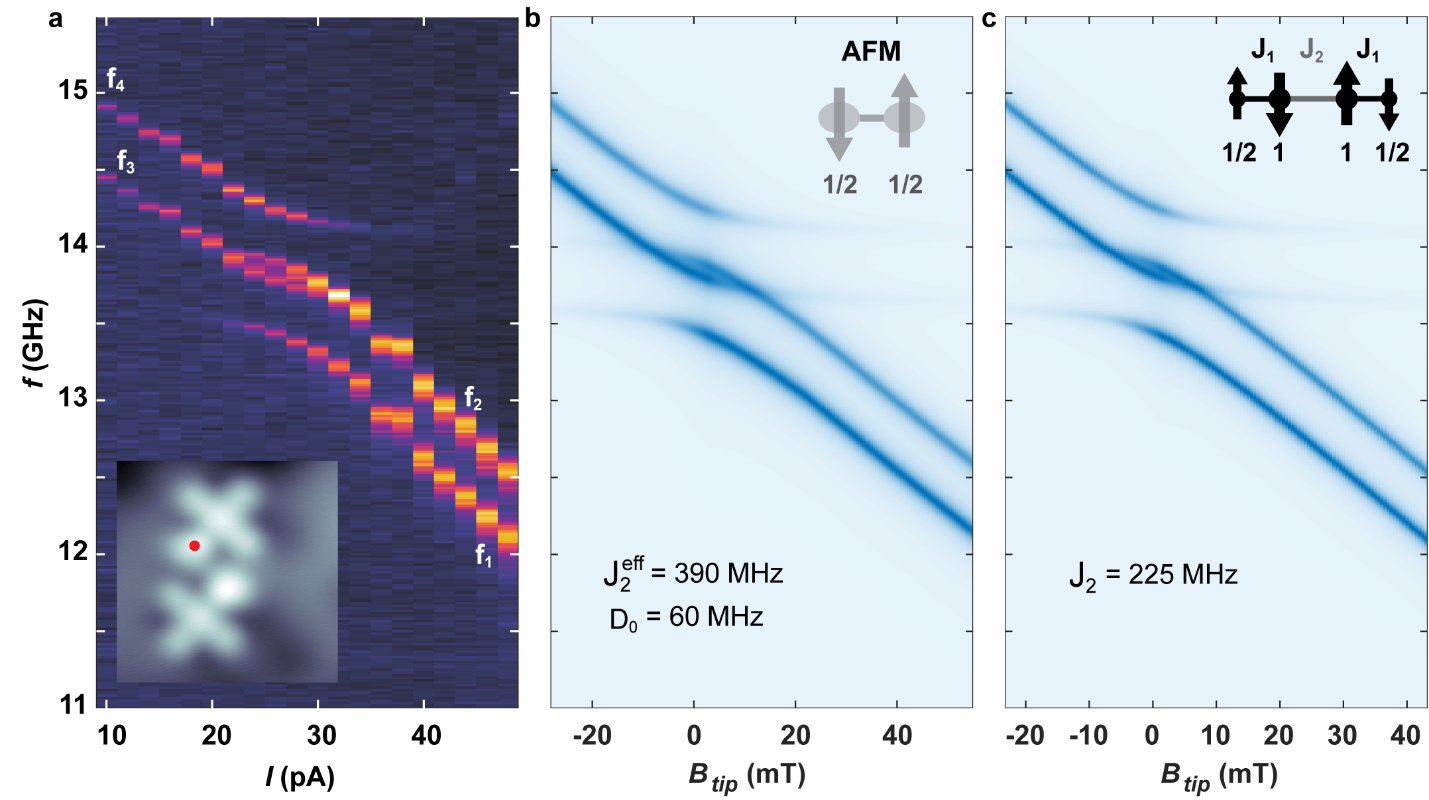
Since for the AFM case for , which causes the resonances to cross twice as the tip approaches (Fig. S18). In contrast, in the FM case, and the two resonances remain separated, as shown in Fig. 4. Thus, crossed or separated transitions at are another indication of AFM and FM coupling, respectively.

**Supplementary Fig. S18. AFM Coupling in a Dimer of Complexes. a,** ESR measurements at various tip heights, showing an avoided level crossing at (, ,). Inset: topographic image (, , image size: ). **B,** Simulation of the coupled spin system using a two-spin model (inset) of spins (1/2, 1/2), with , (corresponding to 1.54 nm, roughly (2,5) MgO lattice) and. **c.** Simulation of the coupled spin system using a four-spin model (inset) of spins (1/2, 1, 1, 1/2) with alternating antiferromagnetic coupling strengths and . The fitting parameters are: , , , , .

We can use the equations of the two spin-model to analyze the data in Fig. 4e and Fig. S18a directly: the magnetic dipolar coupling can be determined by (extracted directly at ) while the inter-complex coupling can be determined by the ESR splitting . For the FM case in Fig. 4, we obtain , For the AFM case in Fig. S18, we find , *.* The two-spin model is verified through our ESR simulation based on the spin Hamiltonian of two coupled spin ½ (dotted line in Fig. 4e and Fig. S18b). In the simulation, the amplitude of the ESR signal is determined by calculating the matrix element of the transitions, with each state thermally populated according to the Boltzmann distribution of its eigenenergy.

To capture minute details in the position and intensity of the peaks, we employ a simulation of the full four-spin system (Fig. 4f and Fig. S18c), where the coupling between adjacent spins still remains antiferromagnetic and the magnetic dipolar couplings are calculated based on the distances (Fig. S19) between all spin centers. The full four spin model does not show any significant deviations from the two-spin model for both the FM case discussed in the main text and the AFM case discussed in this section. Merely the exchange coupling changes by a factor of around two (Fig. S18), which mostly results from the incorporation of the spin number of the Fe(C6H6) (S=1) into the coupling constant in case of the two-spin model. Thus, we conclude that the complexes can be effectively treated as spin ½ systems and that they can serve as building blocks for larger spin structures.


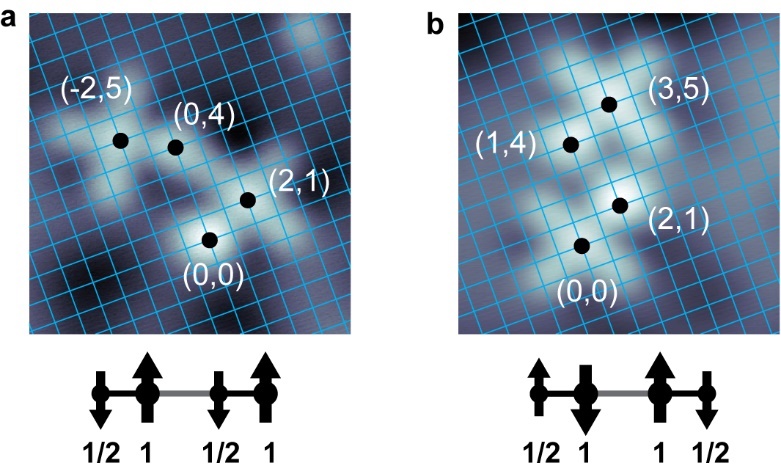


**Supplementary Fig. S19. Lattice fit of two coupled complexes. a.** Topographic image of two ferromagnetically coupled complexes with MgO lattice overlaid as shown in Fig. 4 in the main text. The distances between spins are used for the four-spin model in Fig. 4f. **b.** Topographic image of two antiferromagnetically coupled complexes with MgO lattice overlaid (Fig. S14). The distances between spins are used for the four-spin model in Fig. S14c. Both images: The positions of the Fe and molecule spins are labeled by black dots and are defined relative to the oxygen lattice, which is indicated by a blue grid. Size: 3 nm × 3 nm, setpoint: *V* = -100 mV, *I* = 20 pA.

**References**

1 Baumann, S. *et al.* Origin of Perpendicular Magnetic Anisotropy and Large Orbital Moment in Fe Atoms on MgO. *Physical Review Letters* **115**, 237202 (2015). <https://doi.org/10.1103/PhysRevLett.115.237202>

2 Zhang, X. *et al.* Electron spin resonance of single iron phthalocyanine molecules and role of their non-localized spins in magnetic interactions. *Nature Chemistry* **14**, 59-65 (2022). <https://doi.org/10.1038/s41557-021-00827-7>

3 Čenčariková, H. & Strečka, J. Unconventional strengthening of the bipartite entanglement of a mixed spin-(1/2,1) Heisenberg dimer achieved through Zeeman splitting. *Physical Review B* **102**, 184419 (2020). <https://doi.org/10.1103/PhysRevB.102.184419>

4 Loth, S., Lutz, C. P. & Heinrich, A. J. Spin-polarized spin excitation spectroscopy. *New Journal of Physics* **12**, 125021 (2010). <https://doi.org/10.1088/1367-2630/12/12/125021>

5 Ternes, M. Spin excitations and correlations in scanning tunneling spectroscopy. *New Journal of Physics* **17**, 063016 (2015).

6 Baumann, S. *et al.* Electron paramagnetic resonance of individual atoms on a surface. *Science* **350**, 417-420 (2015). <https://doi.org/doi:10.1126/science.aac8703>

7 Choi, T. *et al.* Atomic-scale sensing of the magnetic dipolar field from single atoms. *Nature Nanotechnology* **12**, 420-424 (2017). <https://doi.org/10.1038/nnano.2017.18>

8 Willke, P. *et al.* Tuning Single-Atom Electron Spin Resonance in a Vector Magnetic Field. *Nano Letters* **19**, 8201-8206 (2019). <https://doi.org/10.1021/acs.nanolett.9b03559>

9 Singha, A. *et al.* Engineering atomic-scale magnetic fields by dysprosium single atom magnets. *Nature Communications* **12**, 4179 (2021). <https://doi.org/10.1038/s41467-021-24465-2>

10 Giannozzi, P. *et al.* QUANTUM ESPRESSO: a modular and open-source software project for quantum simulations of materials. *Journal of Physics: Condensed Matter* **21**, 395502 (2009). <https://doi.org/10.1088/0953-8984/21/39/395502>

11 Giannozzi, P. *et al.* Advanced capabilities for materials modelling with Quantum ESPRESSO. *Journal of Physics: Condensed Matter* **29**, 465901 (2017). <https://doi.org/10.1088/1361-648X/aa8f79>

12 Dal Corso, A. Pseudopotentials periodic table: From H to Pu. *Computational Materials Science* **95**, 337-350 (2014). <https://doi.org/https://doi.org/10.1016/j.commatsci.2014.07.043>

13 Stukowski, A. Visualization and analysis of atomistic simulation data with OVITO–the Open Visualization Tool. *Modelling and Simulation in Materials Science and Engineering* **18**, 015012 (2010). <https://doi.org/10.1088/0965-0393/18/1/015012>

14 Crabtree, R. H. *The Organometallic Chemistry of the Transition Metals*. (John Wiley & Sons, 2009).

15 Wolf, C., Delgado, F., Reina, J. & Lorente, N. Efficient Ab Initio Multiplet Calculations for Magnetic Adatoms on MgO. *The Journal of Physical Chemistry A* **124**, 2318-2327 (2020). <https://doi.org/10.1021/acs.jpca.9b10749>

16 Noodleman, L. Valence bond description of antiferromagnetic coupling in transition metal dimers. *The Journal of Chemical Physics* **74**, 5737-5743 (1981). <https://doi.org/10.1063/1.440939>

17 Zhang, X. *et al.* Influence of the Magnetic Tip on Heterodimers in Electron Spin Resonance Combined with Scanning Tunneling Microscopy. *ACS Nano* **17**, 16935-16942 (2023). <https://doi.org/10.1021/acsnano.3c04024>

18 Seifert, T. S., Kovarik, S., Gambardella, P. & Stepanow, S. Accurate measurement of atomic magnetic moments by minimizing the tip magnetic field in STM-based electron paramagnetic resonance. *Physical Review Research* **3**, 043185 (2021). <https://doi.org/10.1103/PhysRevResearch.3.043185>

19 Willke, P. *et al.* Coherent Spin Control of Single Molecules on a Surface. *ACS Nano* **15**, 17959-17965 (2021). <https://doi.org/10.1021/acsnano.1c06394>

20 Yang, K. *et al.* Coherent spin manipulation of individual atoms on a surface. *Science* **366**, 509-512 (2019). <https://doi.org/doi:10.1126/science.aay6779>

21 Phark, S.-h. *et al.* Electric-Field-Driven Spin Resonance by On-Surface Exchange Coupling to a Single-Atom Magnet. *Advanced Science* **10**, 2302033 (2023). <https://doi.org/https://doi.org/10.1002/advs.202302033>

22 Lado, J. L., Ferrón, A. & Fernández-Rossier, J. Exchange mechanism for electron paramagnetic resonance of individual adatoms. *Physical Review B* **96**, 205420 (2017). <https://doi.org/10.1103/PhysRevB.96.205420>

23 Delgado, F. & Lorente, N. A theoretical review on the single-impurity electron spin resonance on surfaces. *Progress in Surface Science* **96**, 100625 (2021). <https://doi.org/https://doi.org/10.1016/j.progsurf.2021.100625>

24 Reina-Gálvez, J. *et al.* Efficient driving of a spin-qubit using single-atom magnets. *arXiv preprint arXiv:2408.07289* (2024).

25 Chen, Y., Bae, Y. & Heinrich, A. J. Harnessing the Quantum Behavior of Spins on Surfaces. *Advanced Materials* **35**, 2107534 (2023). <https://doi.org/https://doi.org/10.1002/adma.202107534>

26 Reina-Gálvez, J., Wolf, C. & Lorente, N. Many-body nonequilibrium effects in all-electric electron spin resonance. *Physical Review B* **107**, 235404 (2023). <https://doi.org/10.1103/PhysRevB.107.235404>

27 Paul, W. *et al.* Control of the millisecond spin lifetime of an electrically probed atom. *Nature Physics* **13**, 403-407 (2017). <https://doi.org/10.1038/nphys3965>

28 Veldman, L. M. *et al.* Free coherent evolution of a coupled atomic spin system initialized by electron scattering. *Science* **372**, 964-968 (2021). <https://doi.org/doi:10.1126/science.abg8223>
